# Supplementary material
Source: publisher figshare collection journal article supplement (https://frontiersin.figshare.com/ndownloader/files/31212034)
Supplement: Supplementary file [file 31212034]

## Raw Data (*Attention Network Test* )

**"NaN" values =**  
**Commission/Omission Error [97,2% (N = 174 ) of "NaN" values]**  
 OR  
**Reaction Time < 400 ms [2,8% (N = 5 ) of "NaN" values]**

**Child 1**

=

|          |             | No   | Double | Center | Spatial |
|----------|-------------|------|--------|--------|---------|
| Sitting  | Congruent   | 965  | 829    | 871    | 947     |
|          |             | 928  | 1077   | 830    | 1733    |
|          |             | 851  | 555    | 731    | 719     |
|          |             | 1333 | 700    | 989    | 1073    |
|          | Incongruent | NaN  | 894    | 1378   | 1118    |
|          |             | 1572 | 1248   | 1599   | 1507    |
|          |             | 1171 | 1599   | 836    | 1344    |
|          |             | 1993 | 789    | 982    | 976     |
|          | Neutral     | 822  | 729    | 2065   | 1294    |
|          |             | 638  | 728    | 737    | 833     |
|          |             | NaN  | 615    | 742    | 598     |
|          |             | 912  | 1581   | 937    | 1127    |
| Standing | Congruent   | 654  | 591    | 834    | 1024    |
|          |             | 1104 | 979    | 1120   | 1325    |
|          |             | 1024 | 1226   | 872    | 1261    |
|          |             | 871  | 866    | 734    | 904     |
|          | Incongruent | 1515 | 1315   | 1787   | 1516    |
|          |             | 1355 | 2091   | NaN    | 2040    |
|          |             | 1101 | 914    | 932    | 1108    |
|          |             | 759  | NaN    | 1080   | 1000    |
|          | Neutral     | 695  | 819    | 766    | 1320    |
|          |             | 969  | 581    | 774    | 961     |
|          |             | 906  | 956    | 739    | 750     |
|          |             | NaN  | 827    | 629    | 708     |
| Free     | Congruent   | 1325 | 1205   | 1523   | 1211    |
|          |             | 1311 | 1465   | 968    | 1324    |
|          |             | 1839 | 992    | 1020   | 945     |
|          |             | 728  | 1467   | 1188   | 1040    |
|          | Incongruent | 2174 | 872    | 1405   | 1719    |
|          |             | 1065 | 1211   | 1045   | NaN     |
|          |             | 1742 | NaN    | NaN    | 1553    |
|          |             | NaN  | 1389   | 1991   | 1193    |
|          | Neutral     | 1003 | 739    | 2069   | 805     |
|          |             | 916  | 1127   | 827    | 798     |
|          |             | 898  | 1100   | 2073   | 1145    |
|          |             | 1312 | 1012   | 841    | 986     |

Child 2

=

|          |             | No   | Double | Center | Spatial |
|----------|-------------|------|--------|--------|---------|
| Sitting  | Congruent   | 1122 | 1384   | 1559   | 1473    |
|          |             | 1441 | 1919   | 1816   | 1343    |
|          |             | 1611 | 1925   | 1656   | 1865    |
|          |             | 1452 | 2010   | 1436   | 1179    |
|          | Incongruent | 2064 | 2132   | 1566   | 1934    |
|          |             | 1949 | 1859   | NaN    | 1885    |
|          |             | 1953 | 1677   | 1622   | 1323    |
|          |             | 1861 | 1736   | NaN    | 1662    |
|          | Neutral     | 1821 | 1141   | 1189   | 1158    |
|          |             | 1165 | 1128   | 988    | 1058    |
|          |             | 1295 | 1561   | 1288   | 1276    |
|          |             | 1014 | 1277   | 1297   | 1363    |
| Standing | Congruent   | 1508 | 805    | 975    | 811     |
|          |             | 955  | 1005   | 1182   | 803     |
|          |             | 1090 | 726    | 807    | 922     |
|          |             | 890  | 1407   | 1198   | 1019    |
|          | Incongruent | 929  | 972    | 1032   | 924     |
|          |             | 1116 | 1444   | 1724   | 1023    |
|          |             | 1082 | 1003   | 897    | 1300    |
|          |             | 1405 | 1321   | 1312   | 1366    |
|          | Neutral     | 1140 | 922    | 800    | 747     |
|          |             | 1213 | 782    | 1645   | 745     |
|          |             | 1340 | NaN    | 1692   | 1339    |
|          |             | 1683 | 1133   | 1084   | 1100    |
| Free     | Congruent   | 1355 | 1149   | 841    | 1142    |
|          |             | 807  | 765    | 672    | 773     |
|          |             | 976  | 913    | 1033   | 896     |
|          |             | 932  | 1343   | 1232   | 1527    |
|          | Incongruent | NaN  | 1426   | 1302   | 2055    |
|          |             | 1076 | 1067   | 1449   | 1208    |
|          |             | 1431 | 1231   | 998    | 1049    |
|          |             | 1453 | 1053   | 1359   | 912     |
|          | Neutral     | 1136 | 969    | 838    | 1006    |
|          |             | 2149 | 959    | 719    | 846     |
|          |             | 872  | 788    | 919    | 833     |
|          |             | 856  | 904    | 1009   | 1422    |

Child 3

=

|          |             | No   | Double | Center | Spatial |
|----------|-------------|------|--------|--------|---------|
| Sitting  | Congruent   | 948  | 1400   | 1319   | 1162    |
|          |             | 861  | 789    | 1125   | 1511    |
|          |             | 1138 | 822    | 845    | 860     |
|          |             | 833  | 834    | 817    | 818     |
|          | Incongruent | 1107 | 1131   | 1072   | 1266    |
|          |             | 1010 | 1002   | 1339   | 998     |
|          |             | 998  | 1304   | 994    | 996     |
|          |             | 860  | 1005   | 1532   | 842     |
|          | Neutral     | 995  | 962    | 823    | 693     |
|          |             | 726  | 1087   | 1056   | 887     |
|          |             | 777  | 691    | 732    | 830     |
|          |             | 1031 | 707    | 822    | 947     |
| Standing | Congruent   | NaN  | 893    | 1385   | 1695    |
|          |             | 1142 | 1042   | 1133   | 883     |
|          |             | 977  | 1803   | 1192   | NaN     |
|          |             | NaN  | 1467   | 1061   | 1181    |
|          | Incongruent | NaN  | NaN    | 1212   | 1452    |
|          |             | NaN  | 2177   | NaN    | 1234    |
|          |             | 1596 | NaN    | 1361   | NaN     |
|          |             | 1315 | 1600   | 1289   | 1293    |
|          | Neutral     | 1409 | NaN    | 1033   | NaN     |
|          |             | 1085 | 1349   | 1022   | 999     |
|          |             | 1134 | 993    | 857    | 1718    |
|          |             | NaN  | 1225   | 1262   | 1034    |
| Free     | Congruent   | 1178 | 1164   | 1143   | 1171    |
|          |             | 1098 | 959    | 1090   | NaN     |
|          |             | 869  | 751    | 889    | NaN     |
|          |             | NaN  | 1581   | NaN    | 653     |
|          | Incongruent | 969  | 1122   | 1913   | NaN     |
|          |             | NaN  | 1713   | 1159   | 831     |
|          |             | 1370 | 1424   | 1181   | NaN     |
|          |             | NaN  | 918    | 1136   | 985     |
|          | Neutral     | 1008 | 1196   | 726    | 970     |
|          |             | NaN  | 737    | 818    | 1058    |
|          |             | 1129 | 1066   | 891    | 838     |
|          |             | NaN  | 990    | 684    | 544     |

Child 4

=

|          |             | No   | Double | Center | Spatial |
|----------|-------------|------|--------|--------|---------|
| Sitting  | Congruent   | NaN  | NaN    | 588    | 681     |
|          |             | NaN  | 592    | 756    | 528     |
|          |             | NaN  | 733    | 1051   | 1035    |
|          |             | 924  | 911    | 765    | 588     |
|          | Incongruent | 887  | 982    | NaN    | 826     |
|          |             | 1050 | 1377   | 1430   | 831     |
|          |             | 894  | 1159   | 734    | 781     |
|          |             | 1154 | 639    | 812    | 1075    |
|          | Neutral     | 925  | 780    | 905    | NaN     |
|          |             | 1157 | 761    | 850    | 556     |
|          |             | NaN  | 625    | 716    | 602     |
|          |             | 979  | 988    | 790    | 710     |
| Standing | Congruent   | 787  | 554    | 865    | 722     |
|          |             | 787  | 685    | 490    | 609     |
|          |             | 652  | 650    | 514    | 1031    |
|          |             | 601  | 995    | 725    | 787     |
|          | Incongruent | 821  | 1273   | 1063   | 682     |
|          |             | 891  | 565    | 739    | NaN     |
|          |             | 824  | NaN    | 622    | 700     |
|          |             | 1032 | 589    | 933    | 639     |
|          | Neutral     | 583  | 523    | 676    | 551     |
|          |             | 1067 | 517    | 880    | 580     |
|          |             | 1119 | 664    | 723    | 523     |
|          |             | 897  | 609    | 717    | 701     |
| Free     | Congruent   | 654  | 706    | 686    | 400     |
|          |             | 763  | 622    | 630    | 526     |
|          |             | 724  | 556    | 720    | 634     |
|          |             | 796  | 528    | 618    | 419     |
|          | Incongruent | 1365 | 750    | 1046   | 508     |
|          |             | 849  | 742    | 869    | 907     |
|          |             | 846  | 801    | 603    | 406     |
|          |             | 890  | 709    | 750    | NaN     |
|          | Neutral     | 953  | 666    | 777    | 525     |
|          |             | 1590 | 654    | 674    | 521     |
|          |             | 907  | NaN    | 584    | 508     |
|          |             | 896  | NaN    | 606    | 719     |

Child 5

=

|          |             | No   | Double | Center | Spatial |
|----------|-------------|------|--------|--------|---------|
| Sitting  | Congruent   | NaN  | 980    | 838    | 628     |
|          |             | 782  | 799    | 891    | 580     |
|          |             | 1265 | 737    | 715    | 895     |
|          |             | 694  | 945    | 694    | 793     |
|          | Incongruent | 1151 | 800    | 740    | 994     |
|          |             | 917  | 775    | 797    | 924     |
|          |             | 868  | 1616   | 584    | 811     |
|          |             | 830  | 1030   | 1680   | 1471    |
|          | Neutral     | 840  | 1034   | 1005   | 1042    |
|          |             | 1008 | 559    | 628    | NaN     |
|          |             | 882  | 821    | 747    | 590     |
|          |             | 1672 | 633    | 1068   | 682     |
| Standing | Congruent   | 1231 | 688    | 1107   | 861     |
|          |             | 990  | 1403   | NaN    | 549     |
|          |             | 508  | 773    | 613    | 512     |
|          |             | 640  | 1163   | 995    | 459     |
|          | Incongruent | 994  | NaN    | 757    | 868     |
|          |             | 909  | 587    | NaN    | 707     |
|          |             | 947  | NaN    | 537    | 473     |
|          |             | 736  | 537    | 572    | 660     |
|          | Neutral     | 1051 | 679    | 608    | 635     |
|          |             | 823  | 657    | 1046   | 709     |
|          |             | 974  | 608    | 791    | 484     |
|          |             | 701  | 524    | 775    | 846     |
| Free     | Congruent   | 751  | 787    | 1065   | 716     |
|          |             | 1047 | 694    | 733    | 679     |
|          |             | 708  | 568    | 1198   | NaN     |
|          |             | 678  | 654    | 695    | 401     |
|          | Incongruent | 1302 | 993    | 1007   | 996     |
|          |             | 925  | 702    | 1799   | 776     |
|          |             | 951  | 806    | 781    | 993     |
|          |             | 725  | 637    | 995    | 646     |
|          | Neutral     | 674  | 675    | 829    | 673     |
|          |             | 1081 | 528    | 704    | 664     |
|          |             | 658  | 875    | 737    | 724     |
|          |             | 707  | NaN    | 677    | 962     |

Child 6

=

|          |             | No   | Double | Center | Spatial |
|----------|-------------|------|--------|--------|---------|
| Sitting  | Congruent   | 884  | 715    | 783    | 605     |
|          |             | 1295 | 822    | 809    | 815     |
|          |             | 693  | 738    | 823    | 864     |
|          |             | 901  | 1177   | 800    | 1017    |
|          | Incongruent | 1076 | 1027   | 889    | 930     |
|          |             | 1041 | 956    | 872    | 751     |
|          |             | 729  | 587    | 1078   | 1153    |
|          |             | 761  | 958    | 1561   | 869     |
|          | Neutral     | 774  | 870    | 839    | 509     |
|          |             | 1150 | 838    | 1277   | 605     |
|          |             | 854  | 1123   | NaN    | 782     |
|          |             | 1046 | 633    | 730    | 821     |
| Standing | Congruent   | 1100 | 1283   | 774    | 879     |
|          |             | 1260 | 696    | 2256   | 1208    |
|          |             | 721  | 2229   | 1375   | 1200    |
|          |             | 1093 | 1082   | 1377   | 737     |
|          | Incongruent | 1722 | 1166   | 1426   | 1304    |
|          |             | 920  | 879    | 1384   | 1031    |
|          |             | 1218 | 1149   | 856    | 936     |
|          |             | 1156 | 1013   | 1720   | 1330    |
|          | Neutral     | 1131 | 1156   | 582    | 671     |
|          |             | 982  | 748    | 809    | 1026    |
|          |             | 956  | 806    | 1650   | 937     |
|          |             | 956  | 1547   | 704    | 1224    |
| Free     | Congruent   | 1016 | 751    | 861    | 800     |
|          |             | 727  | 693    | 1939   | 708     |
|          |             | 1161 | 1075   | NaN    | 700     |
|          |             | 1085 | 584    | 1004   | 1283    |
|          | Incongruent | 779  | 1320   | 1386   | NaN     |
|          |             | 1090 | NaN    | NaN    | 949     |
|          |             | 847  | 1110   | 1116   | 1050    |
|          |             | 914  | 793    | 1769   | 1995    |
|          | Neutral     | 967  | 1065   | 979    | 943     |
|          |             | 1409 | 1148   | 1035   | 1613    |
|          |             | 1355 | 1019   | 958    | 1026    |
|          |             | NaN  | 892    | 674    | 1125    |

Child 7

=

|          |             | No   | Double | Center | Spatial |
|----------|-------------|------|--------|--------|---------|
| Sitting  | Congruent   | 1093 | 1875   | 1086   | 1278    |
|          |             | 794  | 958    | 949    | 838     |
|          |             | 902  | 823    | 1080   | 863     |
|          |             | 2121 | NaN    | NaN    | 768     |
|          | Incongruent | 1330 | 811    | 1021   | 1446    |
|          |             | 1036 | 757    | 1019   | 911     |
|          |             | 844  | 1084   | 766    | 815     |
|          |             | 853  | 1050   | 987    | 1071    |
|          | Neutral     | 944  | 716    | 882    | 1221    |
|          |             | 668  | 1197   | 982    | 815     |
|          |             | 766  | 770    | NaN    | 1018    |
|          |             | 967  | 1000   | 812    | 940     |
| Standing | Congruent   | 846  | NaN    | 684    | 673     |
|          |             | 1099 | 663    | 814    | 1173    |
|          |             | 588  | 673    | 786    | 775     |
|          |             | 1012 | NaN    | 811    | 774     |
|          | Incongruent | 930  | 700    | 1311   | 958     |
|          |             | 702  | 1487   | 761    | 965     |
|          |             | 1102 | 956    | 743    | 1049    |
|          |             | 1315 | 793    | 889    | 955     |
|          | Neutral     | 871  | 760    | NaN    | 878     |
|          |             | 685  | 878    | 602    | 1270    |
|          |             | 893  | 724    | 672    | 662     |
|          |             | 934  | 593    | 773    | 873     |
| Free     | Congruent   | 1046 | 1171   | 1299   | 1015    |
|          |             | 1272 | 828    | 947    | 861     |
|          |             | 1532 | 1126   | 890    | 937     |
|          |             | 849  | 848    | NaN    | 1694    |
|          | Incongruent | 1275 | 1002   | 1157   | 1064    |
|          |             | 928  | 1301   | 1219   | 1041    |
|          |             | 1160 | 1016   | 1503   | 1314    |
|          |             | 1358 | 1164   | 701    | 995     |
|          | Neutral     | 1077 | 1093   | 1138   | 840     |
|          |             | 1187 | 809    | 944    | 858     |
|          |             | 811  | 1174   | 1437   | 830     |
|          |             | 967  | 908    | 1161   | 721     |

Child 8

=

|          |             | No   | Double | Center | Spatial |
|----------|-------------|------|--------|--------|---------|
| Sitting  | Congruent   | 763  | 806    | NaN    | 1238    |
|          |             | 1120 | 1449   | 1293   | 759     |
|          |             | 867  | 757    | 818    | 865     |
|          |             | 784  | 858    | 1303   | 918     |
|          | Incongruent | 1209 | NaN    | 990    | NaN     |
|          |             | 1083 | 1655   | NaN    | NaN     |
|          |             | 1014 | 1050   | 785    | 1314    |
|          |             | 879  | 995    | 766    | NaN     |
|          | Neutral     | 1187 | 672    | 647    | 1041    |
|          |             | 926  | 1263   | 619    | 907     |
|          |             | 859  | 1007   | 709    | 1238    |
|          |             | 908  | 1029   | 1292   | 951     |
| Standing | Congruent   | 937  | 619    | 817    | 986     |
|          |             | 927  | 722    | 892    | 772     |
|          |             | 766  | 1811   | 650    | 1213    |
|          |             | 878  | 1146   | 698    | NaN     |
|          | Incongruent | NaN  | 784    | 724    | 844     |
|          |             | 1035 | 1008   | NaN    | 655     |
|          |             | 862  | 757    | 1277   | 548     |
|          |             | 923  | 794    | 769    | 1380    |
|          | Neutral     | 756  | 937    | 861    | 762     |
|          |             | 735  | 877    | 591    | 526     |
|          |             | 1174 | 738    | 668    | 914     |
|          |             | 776  | 778    | 864    | 914     |
| Free     | Congruent   | 806  | 578    | 714    | 973     |
|          |             | 978  | 815    | 1024   | NaN     |
|          |             | 923  | 1663   | 582    | 1358    |
|          |             | 1388 | 559    | 540    | 949     |
|          | Incongruent | 776  | 1776   | 1076   | 671     |
|          |             | NaN  | 850    | 926    | 964     |
|          |             | 1019 | 1095   | 887    | 683     |
|          |             | 783  | 940    | 1101   | 644     |
|          | Neutral     | 531  | 644    | 859    | 778     |
|          |             | 710  | 860    | 809    | 924     |
|          |             | 854  | 590    | 804    | 807     |
|          |             | 981  | 791    | 867    | 599     |



Child 9

=

|          |             | No   | Double | Center | Spatial |
|----------|-------------|------|--------|--------|---------|
| Sitting  | Congruent   | 931  | 967    | 833    | 617     |
|          |             | 960  | 927    | NaN    | 795     |
|          |             | 874  | 996    | 830    | 1206    |
|          |             | 1130 | 833    | 1302   | 1952    |
|          | Incongruent | 993  | 699    | 758    | 979     |
|          |             | 736  | 835    | 1297   | 707     |
|          |             | 814  | 1553   | 1648   | 2092    |
|          |             | 899  | 834    | 1458   | 990     |
|          | Neutral     | 714  | 747    | 773    | 892     |
|          |             | 721  | 1000   | 914    | 809     |
|          |             | 1034 | 1139   | 983    | 891     |
|          |             | 1551 | 1175   | 1427   | 877     |
| Standing | Congruent   | 1760 | 682    | 1353   | 1027    |
|          |             | 1308 | 718    | 1149   | 1079    |
|          |             | 813  | 837    | 714    | 1514    |
|          |             | NaN  | 796    | 1063   | 900     |
|          | Incongruent | 1691 | 1021   | 814    | 2107    |
|          |             | 1542 | 874    | 1927   | 1051    |
|          |             | 987  | 1144   | 965    | 718     |
|          |             | 1292 | 716    | 762    | 1519    |
|          | Neutral     | 967  | 864    | NaN    | 1041    |
|          |             | 857  | 732    | 885    | 1204    |
|          |             | 721  | 760    | 768    | 875     |
|          |             | 588  | 863    | 633    | 1056    |
| Free     | Congruent   | 632  | 819    | 1110   | 1371    |
|          |             | 822  | 1597   | 1005   | 1079    |
|          |             | 627  | 1223   | 1365   | 838     |
|          |             | 810  | 1143   | 1106   | 892     |
|          | Incongruent | 796  | 1066   | 715    | 804     |
|          |             | 989  | 1086   | 725    | 810     |
|          |             | 684  | 1489   | 967    | 1197    |
|          |             | 1642 | 1032   | 588    | NaN     |
|          | Neutral     | 771  | 1443   | 975    | 653     |
|          |             | 845  | 653    | 1093   | 952     |
|          |             | 1081 | NaN    | 1039   | 1594    |
|          |             | 787  | 951    | 947    | 1290    |

Child 10

=

|          |             | No   | Double | Center | Spatial |
|----------|-------------|------|--------|--------|---------|
| Sitting  | Congruent   | 1050 | 518    | 997    | 703     |
|          |             | 1000 | 852    | 591    | 694     |
|          |             | 1036 | 618    | 621    | 590     |
|          |             | 672  | 613    | 630    | 482     |
|          | Incongruent | 1025 | 595    | 1567   | 665     |
|          |             | 794  | 571    | 1440   | 754     |
|          |             | 681  | 586    | 784    | 593     |
|          |             | 1225 | 610    | 758    | 590     |
|          | Neutral     | 648  | 847    | 608    | 608     |
|          |             | 758  | 625    | 450    | 716     |
|          |             | 764  | 563    | 634    | 638     |
|          |             | 802  | 508    | 623    | 962     |
| Standing | Congruent   | 655  | 851    | 654    | 839     |
|          |             | 770  | 626    | 649    | 681     |
|          |             | 637  | 691    | NaN    | 688     |
|          |             | 673  | 749    | 627    | 662     |
|          | Incongruent | 772  | 979    | 935    | 807     |
|          |             | 827  | 878    | 734    | 784     |
|          |             | NaN  | 696    | 584    | 546     |
|          |             | 856  | 708    | 717    | 611     |
|          | Neutral     | 1285 | 631    | 703    | 894     |
|          |             | 700  | 533    | 654    | 705     |
|          |             | 623  | 474    | 618    | 602     |
|          |             | 1379 | 836    | 639    | 582     |
| Free     | Congruent   | 821  | 1613   | 614    | NaN     |
|          |             | 767  | 403    | 704    | 841     |
|          |             |      |        |        |         |
|          |             |      |        |        |         |
|          | Incongruent | 769  | 739    | 730    | 697     |
|          |             | 916  | 788    | 581    | 676     |
|          |             |      |        |        |         |
|          |             |      |        |        |         |
|          | Neutral     | 750  | 592    | 779    | 854     |
|          |             | 831  | 654    | 565    | 701     |
|          |             |      |        |        |         |
|          |             |      |        |        |         |

Child 11

=

|          |             | No   | Double | Center | Spatial |
|----------|-------------|------|--------|--------|---------|
| Sitting  | Congruent   | 1306 | 903    | 868    | 931     |
|          |             | NaN  | 963    | 668    | 1092    |
|          |             | 1231 | NaN    | 1027   | 804     |
|          |             | 1721 | 794    | 931    | 977     |
|          | Incongruent | NaN  | 974    | 1179   | 1060    |
|          |             | 1108 | 1003   | 816    | 888     |
|          |             | 1179 | 862    | 1623   | 687     |
|          |             | NaN  | 1578   | 1357   | NaN     |
|          | Neutral     | 1022 | 1962   | 1963   | NaN     |
|          |             | 1168 | 1029   | 604    | 973     |
|          |             | NaN  | 919    | 862    | 1053    |
|          |             | 946  | 1287   | 839    | 1123    |
| Standing | Congruent   | 1421 | 1434   | 697    | 888     |
|          |             | 1396 | 899    | 900    | 901     |
|          |             | 1439 | 794    | 664    | 814     |
|          |             | 909  | 1055   | 862    | 742     |
|          | Incongruent | 1818 | 1027   | 1060   | 1583    |
|          |             | NaN  | 1599   | 1108   | 1293    |
|          |             | NaN  | 937    | 829    | NaN     |
|          |             | 1078 | 882    | 1293   | 1044    |
|          | Neutral     | 1002 | 952    | 1172   | 1214    |
|          |             | NaN  | NaN    | 987    | 976     |
|          |             | NaN  | 994    | 1997   | 552     |
|          |             | NaN  | 1023   | 857    | 1123    |
| Free     | Congruent   | 1240 | 543    | 1202   | 960     |
|          |             | 2212 | 863    | 712    | 1353    |
|          |             | 827  | 1698   | 1082   | NaN     |
|          |             | 748  | 739    | 939    | 841     |
|          | Incongruent | 1005 | 2022   | NaN    | 891     |
|          |             | 2128 | 1877   | 1079   | 1156    |
|          |             | 762  | 1155   | 740    | 1484    |
|          |             | 1205 | 903    | 629    | 973     |
|          | Neutral     | 1410 | 1152   | 1688   | 2286    |
|          |             | 882  | 894    | 764    | 942     |
|          |             | 587  | NaN    | 1087   | 870     |
|          |             | 1139 | 1223   | 1218   | 1038    |

Child 12

=

|          |             | No   | Double | Center | Spatial |
|----------|-------------|------|--------|--------|---------|
| Sitting  | Congruent   | 949  | 856    | 754    | 1335    |
|          |             | 1049 | 1241   | 763    | 888     |
|          |             | 746  | 526    | 842    | NaN     |
|          |             | 703  | 685    | 687    | 1622    |
|          | Incongruent | 860  | 978    | 1098   | 856     |
|          |             | 1191 | 658    | 820    | 1095    |
|          |             | 881  | 683    | 1191   | 1166    |
|          |             | 999  | 949    | 526    | 679     |
|          | Neutral     | 682  | 690    | 740    | 721     |
|          |             | 693  | 739    | 693    | 606     |
|          |             | 765  | 544    | 646    | 597     |
|          |             | NaN  | 681    | 887    | 766     |
| Standing | Congruent   | 2134 | 1200   | 780    | 1133    |
|          |             | 2053 | NaN    | 955    | 874     |
|          |             | 845  | 630    | 702    | 911     |
|          |             | 876  | 745    | 763    | 704     |
|          | Incongruent | 1422 | 1140   | 1324   | 1030    |
|          |             | 1051 | 1089   | 1223   | 967     |
|          |             | 1595 | 944    | 791    | 782     |
|          |             | 1100 | 853    | 862    | 920     |
|          | Neutral     | 1161 | 1074   | 888    | 833     |
|          |             | 1599 | 860    | 897    | 996     |
|          |             | 1216 | 566    | 510    | 551     |
|          |             | 1020 | 518    | 604    | 961     |
| Free     | Congruent   | 1021 | 1129   | 825    | 1569    |
|          |             | 1887 | 852    | 637    | 775     |
|          |             | 863  | NaN    | 788    | 876     |
|          |             | 989  | 587    | 597    | 898     |
|          | Incongruent | 823  | 863    | 1886   | 1026    |
|          |             | 913  | NaN    | NaN    | 781     |
|          |             | 1491 | 830    | 1218   | NaN     |
|          |             | 1250 | 952    | 705    | 622     |
|          | Neutral     | 938  | 654    | 675    | 661     |
|          |             | 624  | 739    | 1122   | 989     |
|          |             | 600  | 559    | 1562   | 684     |
|          |             | 793  | 782    | 743    | 740     |

**Child 13**

=

|          |             | No   | Double | Center | Spatial |
|----------|-------------|------|--------|--------|---------|
| Sitting  | Congruent   | 687  | 577    | 606    | 842     |
|          |             | 761  | 846    | 618    | 724     |
|          |             | 954  | 476    | 605    | 668     |
|          |             | 836  | 619    | 663    | 694     |
|          | Incongruent | 1018 | 900    | 724    | 1164    |
|          |             | 673  | 898    | 605    | 898     |
|          |             | 882  | 613    | 628    | 651     |
|          |             | 929  | NaN    | 1086   | 595     |
|          | Neutral     | 651  | 579    | 629    | 773     |
|          |             | 745  | 803    | 685    | 477     |
|          |             | 643  | 638    | 737    | 706     |
|          |             | 731  | 490    | 644    | 638     |
| Standing | Congruent   | 913  | 723    | 756    | 598     |
|          |             | 672  | 565    | 636    | 816     |
|          |             | 675  | 443    | 547    | 656     |
|          |             | 753  | 718    | 553    | 656     |
|          | Incongruent | 834  | 971    | 561    | 707     |
|          |             | 702  | 570    | 619    | 582     |
|          |             | 647  | 675    | 613    | 492     |
|          |             | 727  | 525    | 1019   | 742     |
|          | Neutral     | 634  | 583    | 579    | 614     |
|          |             | 518  | 501    | 788    | 532     |
|          |             | 848  | 458    | 529    | 625     |
|          |             | 580  | 952    | 621    | 684     |
| Free     | Congruent   | 796  | 919    | 587    | 478     |
|          |             | 699  | 710    | 559    | 663     |
|          |             | 714  | 546    | 703    | 459     |
|          |             | 946  | 583    | 767    | 682     |
|          | Incongruent | 758  | 689    | 816    | 852     |
|          |             | 745  | 689    | 712    | 692     |
|          |             | 815  | 622    | 640    | 954     |
|          |             | 662  | 650    | 862    | 1113    |
|          | Neutral     | 978  | 622    | 783    | 649     |
|          |             | 686  | 915    | 775    | 474     |
|          |             | 732  | 556    | 702    | 497     |
|          |             | 924  | 549    | 583    | 565     |

Child 14

=

|          |             | No   | Double | Center | Spatial |
|----------|-------------|------|--------|--------|---------|
| Sitting  | Congruent   | 979  | 1260   | 1723   | 938     |
|          |             | 1554 | 1011   | 917    | 973     |
|          |             | 1646 | 1220   | 1822   | 929     |
|          |             | 1076 | 1101   | 921    | NaN     |
|          | Incongruent | 1601 | 1663   | 1477   | 1758    |
|          |             | 1653 | NaN    | 1745   | 1207    |
|          |             | 1315 | 1160   | 1016   | 1328    |
|          |             | 1379 | 1952   | 970    | 980     |
|          | Neutral     | 1058 | 1961   | 809    | 1305    |
|          |             | NaN  | 900    | 1332   | 1456    |
|          |             | 1291 | 915    | 1027   | NaN     |
|          |             | NaN  | 1167   | 840    | 1434    |
| Standing | Congruent   | 1529 | 1096   | 936    | 854     |
|          |             | 1484 | NaN    | 986    | 915     |
|          |             | NaN  | 1569   | 1287   | 1065    |
|          |             | 1294 | 941    | 1859   | 1152    |
|          | Incongruent | 1004 | 1484   | 1173   | 1387    |
|          |             | 1121 | 1304   | 1938   | 1384    |
|          |             | 1179 | 1643   | 908    | 1119    |
|          |             | 1347 | 1255   | 1269   | 953     |
|          | Neutral     | 907  | 771    | 976    | 1001    |
|          |             | 1099 | 796    | 1205   | 583     |
|          |             | 911  | 1064   | 1126   | 926     |
|          |             | NaN  | 1118   | 842    | 1135    |
| Free     | Congruent   | NaN  | NaN    | 1407   | 943     |
|          |             | 1959 | 801    | 1842   | 1392    |
|          |             | 1105 | 1389   | 1793   | 552     |
|          |             | 1882 | 1357   | 976    | 2208    |
|          | Incongruent | 649  | 1318   | 969    | 1263    |
|          |             | 1635 | 2032   | 1099   | 2289    |
|          |             | 800  | NaN    | 925    | 1037    |
|          |             | NaN  | 783    | 1838   | 1932    |
|          | Neutral     | 862  | 1864   | 1332   | 1173    |
|          |             | 1334 | 1700   | 1145   | 1892    |
|          |             | NaN  | 1311   | 781    | 1112    |
|          |             | 1573 | 2080   | 1181   | 1403    |

Child 15

=

|          |             | No   | Double | Center | Spatial |
|----------|-------------|------|--------|--------|---------|
| Sitting  | Congruent   | 1676 | 666    | 919    | 677     |
|          |             | 805  | 778    | 882    | 1425    |
|          |             | 886  | 607    | 849    | 681     |
|          |             | 1039 | 853    | 817    | 743     |
|          | Incongruent | 977  | 1357   | 1158   | 1498    |
|          |             | 809  | 1660   | 807    | 567     |
|          |             | 1005 | 889    | 646    | 1263    |
|          |             | 745  | 667    | 904    | 893     |
|          | Neutral     | NaN  | 618    | 740    | 700     |
|          |             | 873  | 688    | 585    | 620     |
|          |             | 906  | 811    | 593    | 737     |
|          |             | 894  | 685    | 1110   | 1394    |
| Standing | Congruent   | 1174 | 788    | 837    | 472     |
|          |             | 1172 | 1094   | 709    | 676     |
|          |             | 781  | 554    | 1195   | 693     |
|          |             | 2207 | 771    | 1430   | 2066    |
|          | Incongruent | 1070 | 1101   | 1612   | 840     |
|          |             | 842  | 862    | NaN    | 809     |
|          |             | 1129 | 976    | 603    | 1240    |
|          |             | 817  | 434    | 704    | 935     |
|          | Neutral     | 683  | 552    | 652    | 705     |
|          |             | 894  | 916    | 1164   | 2241    |
|          |             | 1241 | 515    | 1011   | 888     |
|          |             | 864  | 1149   | 860    | 598     |
| Free     | Congruent   | 515  | 923    | 532    | 865     |
|          |             | 975  | 409    | 581    | 966     |
|          |             | 1067 | NaN    | 631    | 833     |
|          |             | 1150 | 862    | 770    | 726     |
|          | Incongruent | 1020 | NaN    | 458    | 881     |
|          |             | 1846 | 706    | 896    | 1188    |
|          |             | 929  | 830    | 970    | 1014    |
|          |             | 819  | 791    | 1114   | 978     |
|          | Neutral     | 691  | 647    | 848    | NaN     |
|          |             | 938  | 774    | 1074   | 1087    |
|          |             | 1833 | 726    | 424    | 864     |
|          |             | 655  | 856    | 822    | 836     |

Child 16

=

|          |             | No   | Double | Center | Spatial |
|----------|-------------|------|--------|--------|---------|
| Sitting  | Congruent   | 798  | 947    | 1022   | 1605    |
|          |             | 1049 | 1105   | 1005   | 800     |
|          |             | 1492 | 906    | NaN    | 858     |
|          |             | 1068 | 1001   | 835    | 1387    |
|          | Incongruent | 940  | 1734   | 1157   | 2098    |
|          |             | 1218 | 1236   | 2150   | 1625    |
|          |             | 1308 | NaN    | 1099   | 1500    |
|          |             | 1724 | NaN    | 1304   | 801     |
|          | Neutral     | NaN  | 1197   | 753    | 1027    |
|          |             | NaN  | 948    | 1782   | 1862    |
|          |             | 924  | 1605   | 2004   | 825     |
|          |             | 1218 | 1652   | 943    | 910     |
| Standing | Congruent   | 515  | 923    | 532    | 865     |
|          |             | 975  | 409    | 581    | 966     |
|          |             | 922  | 1050   | 865    | 1143    |
|          |             | 1489 | 1018   | 986    | 786     |
|          | Incongruent | 1020 | NaN    | 458    | 881     |
|          |             | 1846 | 706    | 896    | 1188    |
|          |             | 764  | 1695   | 1515   | 929     |
|          |             | 1145 | 1095   | 807    | 1001    |
|          | Neutral     | 691  | 647    | 848    | NaN     |
|          |             | 938  | 774    | 1074   | 1087    |
|          |             | 1665 | 915    | 2180   | 1384    |
|          |             | 1985 | 742    | 1186   | 903     |
| Free     | Congruent   | 808  | 870    | 1395   | 1294    |
|          |             | 1919 | 1007   | 1583   | 884     |
|          |             | 1033 | NaN    | 1045   | 855     |
|          |             | NaN  | NaN    | 2004   | 878     |
|          | Incongruent | 1888 | 1214   | 1132   | 1416    |
|          |             | 1808 | 1412   | 665    | 1074    |
|          |             | 1025 | 1437   | 1200   | 779     |
|          |             | 1285 | NaN    | 1058   | 990     |
|          | Neutral     | 767  | 960    | NaN    | 1175    |
|          |             | 852  | 633    | 1201   | 1413    |
|          |             | 921  | 1184   | 1242   | 784     |
|          |             | 1270 | 1152   | 774    | NaN     |



Child 17

=

|          |             | No   | Double | Center | Spatial |
|----------|-------------|------|--------|--------|---------|
| Sitting  | Congruent   | 733  | 1010   | 1082   | 2092    |
|          |             | 830  | 1146   | 732    | 1017    |
|          |             | 918  | 731    | 901    | 747     |
|          |             | 930  | 792    | 750    | 855     |
|          | Incongruent | 1543 | 1158   | 705    | 1548    |
|          |             | 926  | 1128   | 1034   | 1534    |
|          |             | 1678 | 1159   | 975    | 1025    |
|          |             | 1609 | 903    | 1003   | 944     |
|          | Neutral     | 641  | 948    | 1481   | 915     |
|          |             | 1645 | 1859   | 747    | 1023    |
|          |             | 1118 | 870    | 923    | 1082    |
|          |             | 1052 | 1099   | 834    | 1371    |
| Standing | Congruent   | 985  | 1215   | 1388   | 1022    |
|          |             | 992  | 877    | 1190   | 657     |
|          |             | 981  | 1507   | 1834   | 899     |
|          |             | 829  | 1022   | 988    | 1042    |
|          | Incongruent | 2064 | 1052   | NaN    | 1330    |
|          |             | 913  | 823    | 912    | 1668    |
|          |             | 886  | 975    | 860    | 1850    |
|          |             | 1032 | 1232   | 1092   | 1358    |
|          | Neutral     | 1808 | 898    | 1230   | 1568    |
|          |             | 1051 | 1076   | 843    | 1213    |
|          |             | 933  | 828    | 790    | 728     |
|          |             | 945  | 778    | 875    | 1038    |
| Free     | Congruent   | 1087 | 754    | 914    | 1265    |
|          |             | 1499 | 639    | 793    | 825     |
|          |             | 1106 | NaN    | 1085   | 1071    |
|          |             | 1512 | 814    | 1536   | 768     |
|          | Incongruent | 1459 | 1233   | 877    | 866     |
|          |             | 1177 | 1578   | 1287   | 1016    |
|          |             | 801  | 708    | 1492   | 892     |
|          |             | 768  | 1346   | 987    | NaN     |
|          | Neutral     | 1290 | 1209   | 1240   | 1189    |
|          |             | 1124 | 823    | 1016   | 780     |
|          |             | 945  | 1168   | 946    | 702     |
|          |             | 973  | 1010   | 752    | 856     |

Child 18

=

|          |             | No   | Double | Center | Spatial |
|----------|-------------|------|--------|--------|---------|
| Sitting  | Congruent   | 734  | 440    | 834    | 618     |
|          |             | 648  | 558    | 1017   | 567     |
|          |             | 550  | 686    | 764    | 426     |
|          |             | 1006 | 826    | 773    | 607     |
|          | Incongruent | 723  | 732    | 942    | 714     |
|          |             | 755  | 569    | 636    | 739     |
|          |             | 652  | 1134   | 768    | 1290    |
|          |             | NaN  | 626    | 649    | 739     |
|          | Neutral     | 601  | 458    | 634    | 680     |
|          |             | 719  | 445    | 566    | 820     |
|          |             | 569  | 604    | 686    | 599     |
|          |             | 1267 | 512    | 507    | 779     |
| Standing | Congruent   | 906  | 1217   | 613    | 902     |
|          |             | 1027 | 777    | 708    | 797     |
|          |             | 1199 | 858    | 516    | 606     |
|          |             | 764  | 798    | 604    | 623     |
|          | Incongruent | 1051 | NaN    | 879    | 1337    |
|          |             | NaN  | NaN    | 1556   | 1049    |
|          |             | 936  | 767    | 682    | 1012    |
|          |             | 753  | 716    | 741    | 737     |
|          | Neutral     | 606  | 581    | 546    | 742     |
|          |             | 1029 | 833    | 768    | 865     |
|          |             | 904  | 785    | 575    | 856     |
|          |             | 496  | 576    | 494    | 676     |
| Free     | Congruent   | 599  | 507    | 673    | 595     |
|          |             | 630  | 928    | 733    | 561     |
|          |             | 581  | 499    | 501    | 484     |
|          |             | 1783 | 573    | 559    | 1012    |
|          | Incongruent | 659  | 830    | 661    | 674     |
|          |             | 673  | NaN    | 814    | 907     |
|          |             | 686  | 848    | 639    | 518     |
|          |             | 611  | 587    | 577    | NaN     |
|          | Neutral     | NaN  | 566    | 762    | 553     |
|          |             | 617  | 629    | 998    | 575     |
|          |             | 694  | 840    | 465    | 486     |
|          |             | 628  | 577    | 602    | 856     |

Child 19

=

|          |             | No   | Double | Center | Spatial |
|----------|-------------|------|--------|--------|---------|
| Sitting  | Congruent   | 1111 | 914    | 817    | 1678    |
|          |             | 1221 | 875    | 1015   | 574     |
|          |             | 1074 | 885    | 717    | 820     |
|          |             | 1361 | 878    | NaN    | 1376    |
|          | Incongruent | 1086 | 1178   | 979    | 933     |
|          |             | 837  | 909    | NaN    | 813     |
|          |             | 1177 | 967    | 1185   | 1431    |
|          |             | 1556 | 1113   | 1066   | 1385    |
|          | Neutral     | 780  | 919    | 1102   | 859     |
|          |             | 1516 | 1028   | 769    | 897     |
|          |             | 832  | 880    | 619    | 596     |
|          |             | 1117 | NaN    | 989    | 734     |
| Standing | Congruent   | NaN  | 778    | 1187   | 955     |
|          |             | NaN  | 782    | 999    | 853     |
|          |             | 1205 | 847    | 1127   | 808     |
|          |             | 1227 | 842    | 853    | 1065    |
|          | Incongruent | 1191 | 1104   | 943    | 1169    |
|          |             | 1345 | 826    | 1001   | 939     |
|          |             | 992  | 1207   | 994    | 764     |
|          |             | 1269 | 1019   | 945    | 1008    |
|          | Neutral     | 1008 | 1070   | 766    | NaN     |
|          |             | 1260 | 925    | NaN    | 819     |
|          |             | 1169 | 775    | 781    | 834     |
|          |             | 993  | 919    | 785    | 734     |
| Free     | Congruent   | 793  | 957    | 882    | 500     |
|          |             | 678  | 795    | 794    | 1038    |
|          |             | 1544 | NaN    | 949    | 1091    |
|          |             | 1762 | 1265   | 916    | 607     |
|          | Incongruent | 702  | 763    | 447    | 887     |
|          |             | 1199 | 786    | 617    | 817     |
|          |             | 1436 | 869    | 797    | 995     |
|          |             | 756  | 1018   | 851    | 906     |
|          | Neutral     | 1198 | 1088   | 1574   | 894     |
|          |             | 1012 | 1107   | 969    | 1097    |
|          |             | 1220 | 711    | 1655   | 799     |
|          |             | 984  | 631    | 1063   | 1057    |

Child 20

=

|          |             | No   | Double | Center | Spatial |
|----------|-------------|------|--------|--------|---------|
| Sitting  | Congruent   | 994  | 872    | 558    | 450     |
|          |             | 1455 | 610    | 672    | 409     |
|          |             | 963  | 743    | 548    | 463     |
|          |             | 809  | 525    | 929    | 707     |
|          | Incongruent | 652  | 1368   | 801    | 820     |
|          |             | NaN  | 718    | 1738   | NaN     |
|          |             | 842  | 537    | 761    | 620     |
|          |             | 949  | 780    | 641    | 874     |
|          | Neutral     | 941  | 479    | 786    | 624     |
|          |             | 532  | 649    | 1100   | 539     |
|          |             | 660  | 610    | 599    | 626     |
|          |             | 813  | 561    | 1118   | 627     |
| Standing | Congruent   | 723  | 812    | 643    | 529     |
|          |             | 676  | 800    | 749    | 527     |
|          |             | 685  | 624    | 726    | 654     |
|          |             | 765  | 567    | 753    | 664     |
|          | Incongruent | 779  | NaN    | 1088   | 694     |
|          |             | 761  | 675    | 875    | 815     |
|          |             | 903  | 588    | 1140   | 536     |
|          |             | 861  | 680    | 901    | 820     |
|          | Neutral     | 766  | 461    | 734    | 913     |
|          |             | 658  | 598    | 497    | 586     |
|          |             | 629  | 826    | 744    | 864     |
|          |             | 698  | 621    | 683    | 516     |
| Free     | Congruent   | NaN  | 718    | 1041   | 787     |
|          |             | 876  | 563    | 749    | 647     |
|          |             | 724  | 718    | 542    | 599     |
|          |             | 587  | 556    | 859    | 611     |
|          | Incongruent | 975  | 554    | 1040   | 690     |
|          |             | 862  | 795    | NaN    | 571     |
|          |             | 1134 | 691    | 435    | 563     |
|          |             | 680  | 1060   | 762    | 600     |
|          | Neutral     | NaN  | 648    | 478    | 631     |
|          |             | 892  | 583    | 783    | 612     |
|          |             | 930  | 533    | 687    | 1010    |
|          |             | 578  | 730    | 682    | 699     |

Child 21

=

|          |             | No   | Double | Center | Spatial |
|----------|-------------|------|--------|--------|---------|
| Sitting  | Congruent   | 1875 | 995    | 1074   | 910     |
|          |             | 1211 | 1421   | 1383   | 1519    |
|          |             | 1482 | 1213   | 1352   | 1159    |
|          |             | 1017 | NaN    | 1007   | 1670    |
|          | Incongruent | 1494 | 1373   | 2027   | 1122    |
|          |             | 2049 | 1111   | NaN    | 1159    |
|          |             | NaN  | 1895   | 755    | 1621    |
|          |             | 1291 | 945    | 1119   | NaN     |
|          | Neutral     | 1732 | 1097   | 1692   | NaN     |
|          |             | 1128 | 1392   | 950    | 1134    |
|          |             | 983  | 918    | 889    | 858     |
|          |             | 1224 | NaN    | 895    | 1352    |
| Standing | Congruent   | 1206 | 1989   | 1457   | 1507    |
|          |             | 1511 | 2111   | 1174   | 1386    |
|          |             | 1171 | 1401   | 1201   | 1317    |
|          |             | 1034 | 940    | NaN    | 1130    |
|          | Incongruent | 1836 | 1792   | NaN    | 1612    |
|          |             | 975  | 1207   | 1136   | 1311    |
|          |             | 1223 | 2124   | 2107   | 1641    |
|          |             | NaN  | 1522   | 1457   | 1392    |
|          | Neutral     | 1117 | 1659   | 855    | 1303    |
|          |             | 1950 | 1541   | 1281   | 1511    |
|          |             | 1050 | 1907   | 1279   | NaN     |
|          |             | 1119 | 2094   | 791    | 1314    |
| Free     | Congruent   | 1245 | 1279   | 2108   | 1395    |
|          |             | 2115 | 1987   | 1198   | 993     |
|          |             | 1040 | 1409   | 1553   | 1195    |
|          |             | NaN  | 1232   | 1207   | 1313    |
|          | Incongruent | 1871 | 1231   | 1675   | 1971    |
|          |             | 2034 | 1211   | 1600   | 1326    |
|          |             | 1590 | 1767   | 1846   | NaN     |
|          |             | 1445 | 1289   | 1109   | 1226    |
|          | Neutral     | 1415 | 1310   | 1395   | 1592    |
|          |             | 1091 | 1104   | 1297   | 1439    |
|          |             | 1867 | 999    | 1021   | 1301    |
|          |             | 1370 | 1880   | 1119   | 1266    |
